# Supplementary material for: Autosomal Dominant Retinal Dystrophies Caused by a Founder Splice Site Mutation, c.828+3A>T, in PRPH2 and Protein Haplotypes in trans as Modifiers
Source: PubMed Central journal article supplement — Invest Ophthalmol Vis Sci. 2016 Feb 3;57(2):349–59. doi: 10.1167/iovs.15-16965 (PMC4736744; doi:10.1167/iovs.15-16965), 2016-02-03
Supplement: i1552-5783-57-2-349-s01.pdf [file i1552-5783-57-2-349-s01.pdf]

## SUPPLEMENTARY DATA

| Exon          | Primer sequences 5' to 3' | Size in bp |
|---------------|---------------------------|------------|
| <i>ROM1</i>   |                           |            |
| Ex 1A Forward | GGGGCTGACAGGGGGGCG        | 339        |
| Ex 1A Reverse | GGGGCAGGACAGGGAACTG       |            |
| Ex 1B Forward | CCTGTCAGTTCCTGTCCTGC      | 450        |
| Ex 1B Reverse | GAGGAAGGGAGACGCAAATCAC    |            |
| Ex 2 Forward  | AGGCCTCTATCTCCAGACAT      | 450        |
| Ex 2 Reverse  | AGTCCCGGGTGGGAGGAGGT      |            |
| Ex3 Forward   | CAACCCTGGGCCTCTTGGAA      | 403        |
| Ex3 Reverse   | GCCTTGTAAGGAGTTGTGA       |            |
| <i>GUCA1</i>  |                           |            |
| Ex 3 Forward  | ACAGCTCAAGGCTGTAATCC      | 598        |
| Ex 3 Reverse  | GGTCCCTCCAGCACTTCC        |            |
| Ex 4 Forward  | GCCTGAGGCTGGAGTGAG        | 285        |
| Ex 4 Reverse  | TGTTCTAACCTGGGCTCTC       |            |
| Ex 5 Forward  | CCCAATCCTACCCCTGAGAT      | 246        |
| Ex 5 Reverse  | CCTCTCCTTTAGTGACCTTCCA    |            |
| Ex 6 Forward  | TGCTCTGGACTGCAGAAATG      | 476        |
| Ex 6 Reverse  | GCAGAGGGATGTTGAACAGTG     |            |
| <i>NXNL1</i>  |                           |            |
| Ex 1 Forward  | TGAAGTCCTAAGCTGGTTTTCT    | 489        |
| Ex 1 Reverse  | TTCACTTTCAGCGAACATGC      |            |
| Ex 2 Forward  | GATCCGTCCAGACTGACCTG      | 384        |
| Ex 2 Reverse  | TCATCAACAAACCCCACTCC      |            |

Supplement 1: Primers used for sequencing *ROM1*, *GUCA1*, and *NXNL1* genes.

Supplement 2: Figures for family pedigrees.

The phenotypes of affected individuals and pedigrees showing autosomal dominant inheritance with variable expressivity for 14 families (Fam1, Fam2, Fam3, Fam4, Fam5, Fam6, Fam7, Fam8, Fam11, Fam12, Fam13, Fam14, Fam15 and Fam16) are shown. Please refer to table 1 for phenotype and haplotype in *trans* data. In some families only single individuals were

available for the study without pedigree information (Fam9, Fam10, Fam17, Fam18 and Fam19). Phenotypes are represented by PD –Pattern dystrophy, RP- retinitis pigmentosa, CRD – cone rod dystrophy, CACD- central areolar chorioretinal dystrophy, and A –affected, when an affected individual's fundus photo was not available for evaluation.

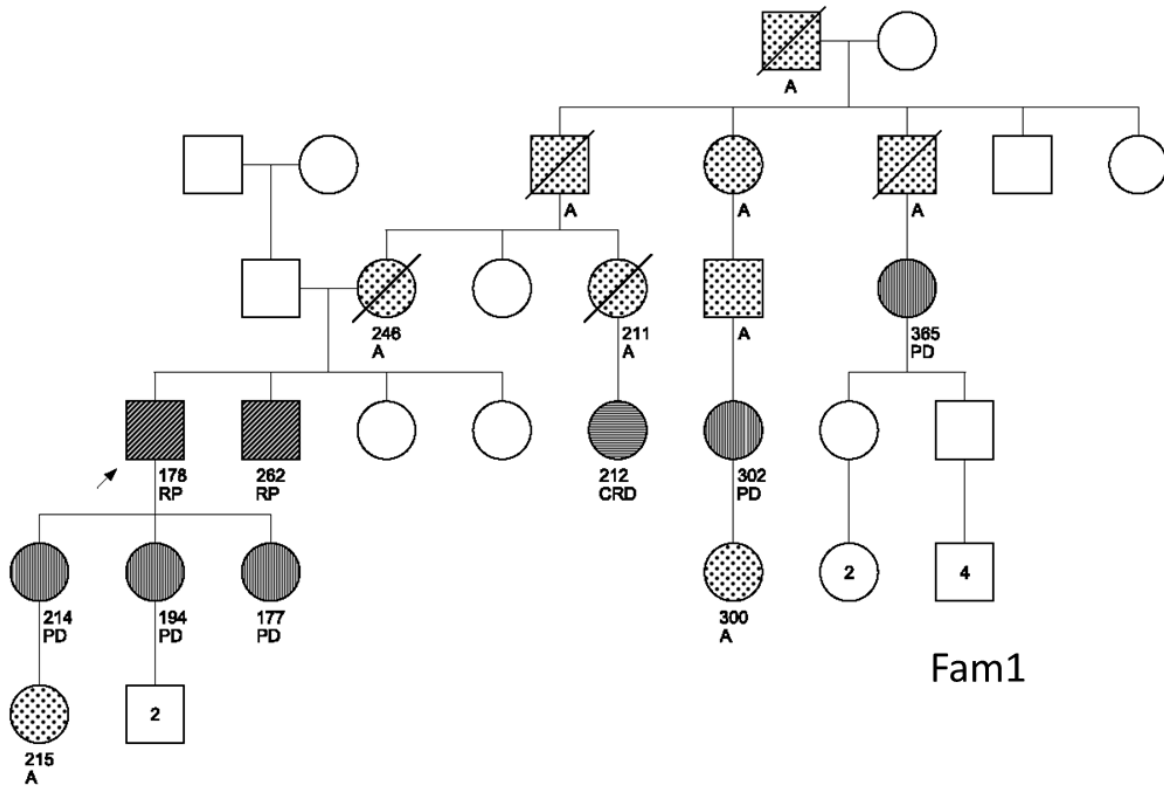

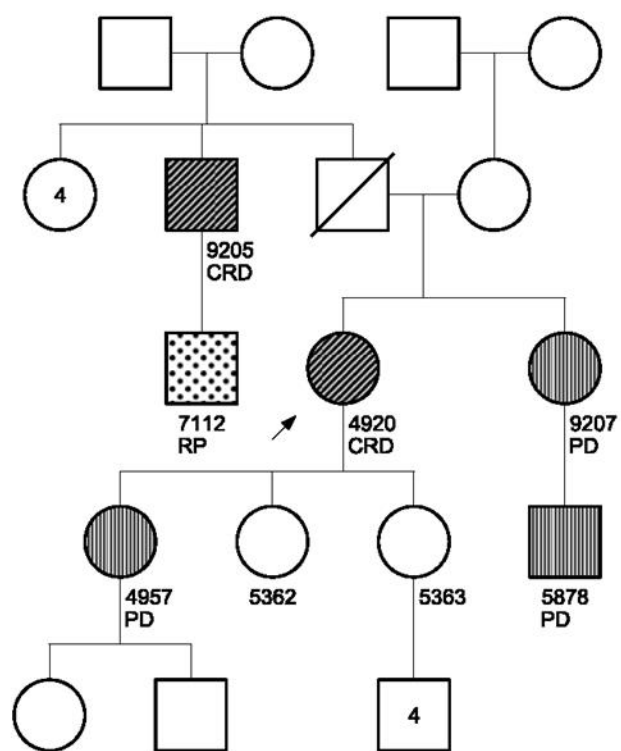

FAM2

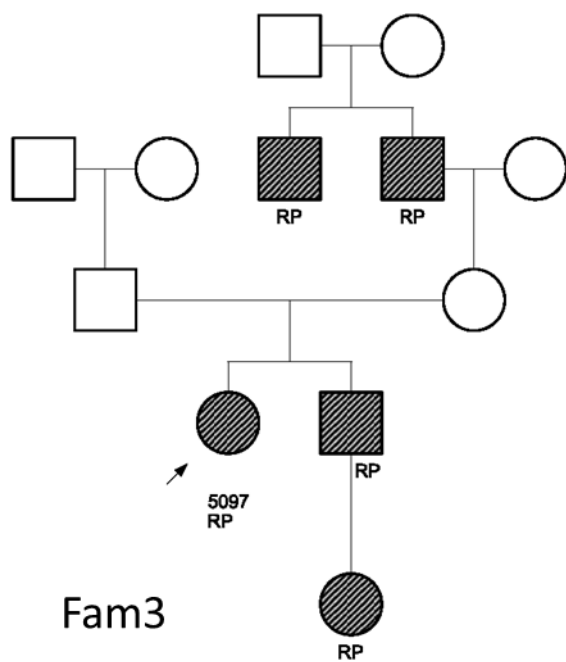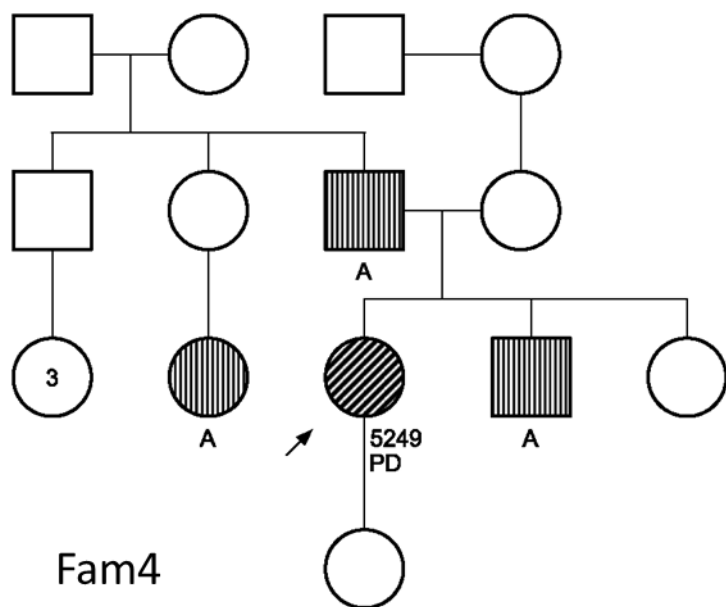

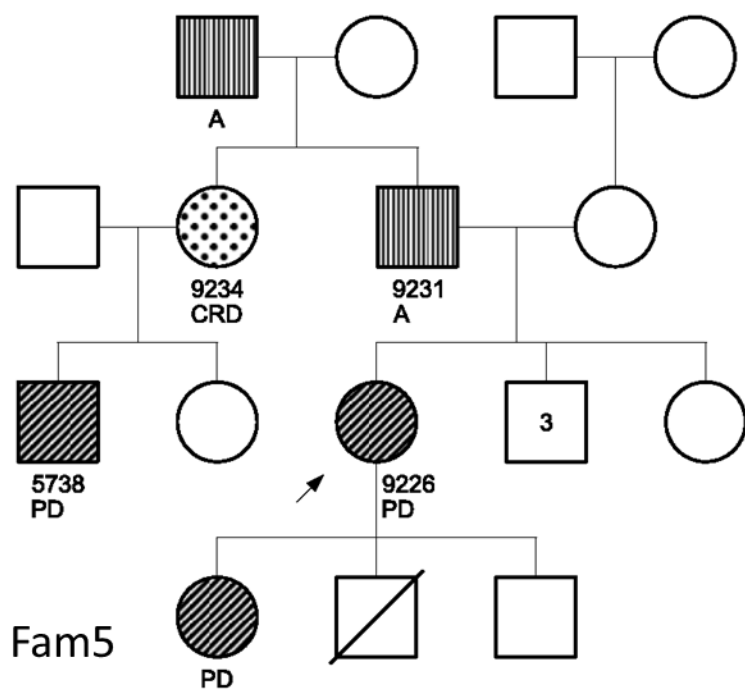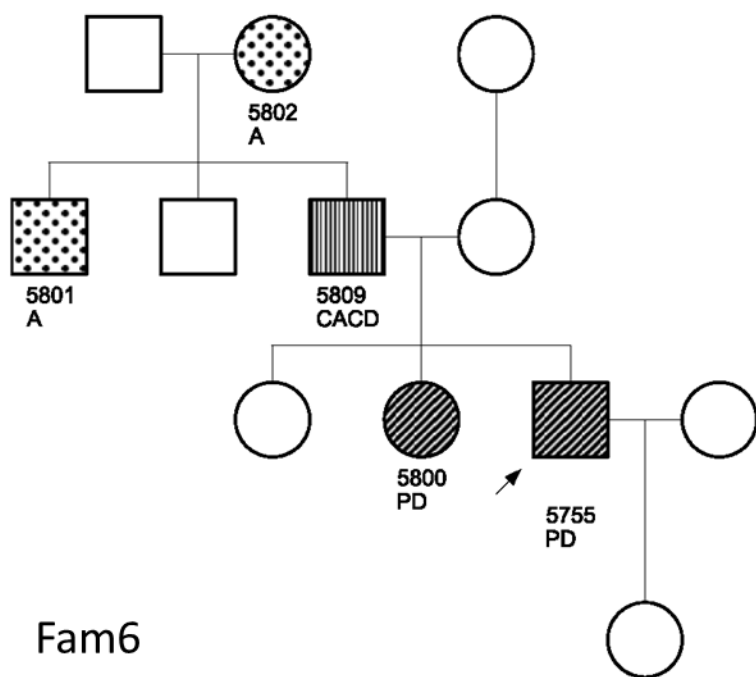

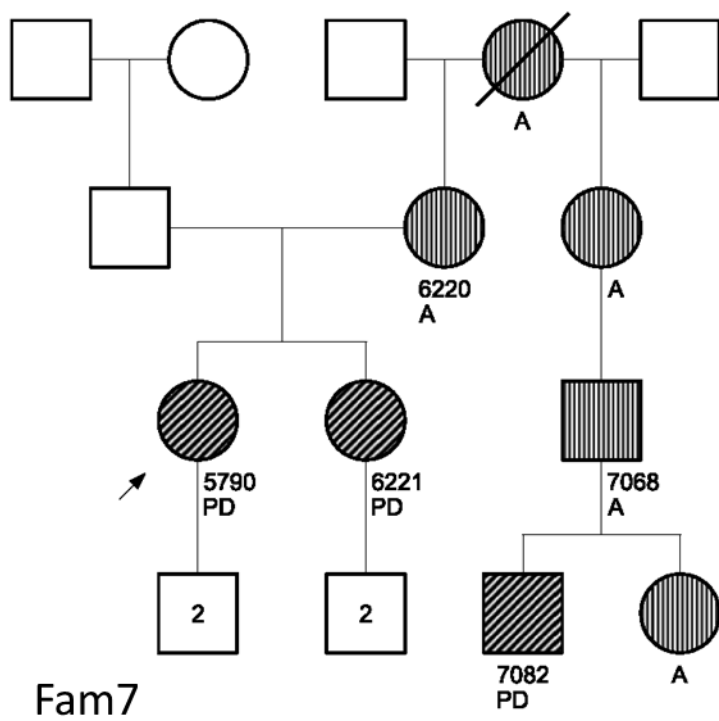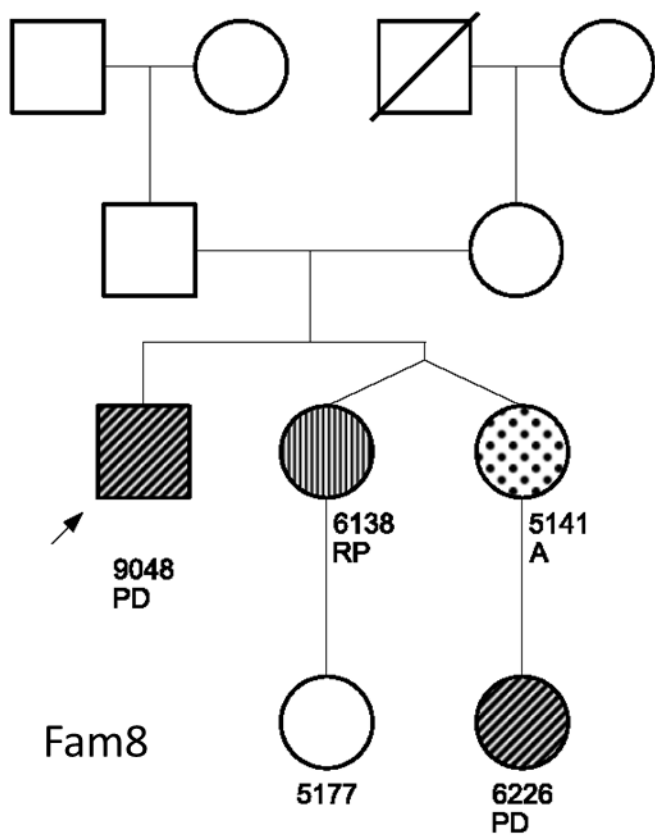

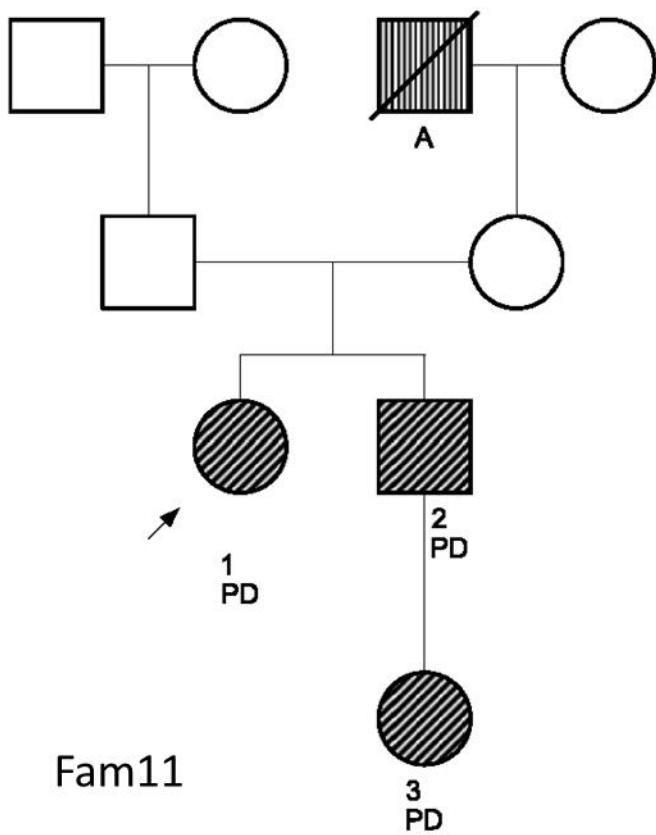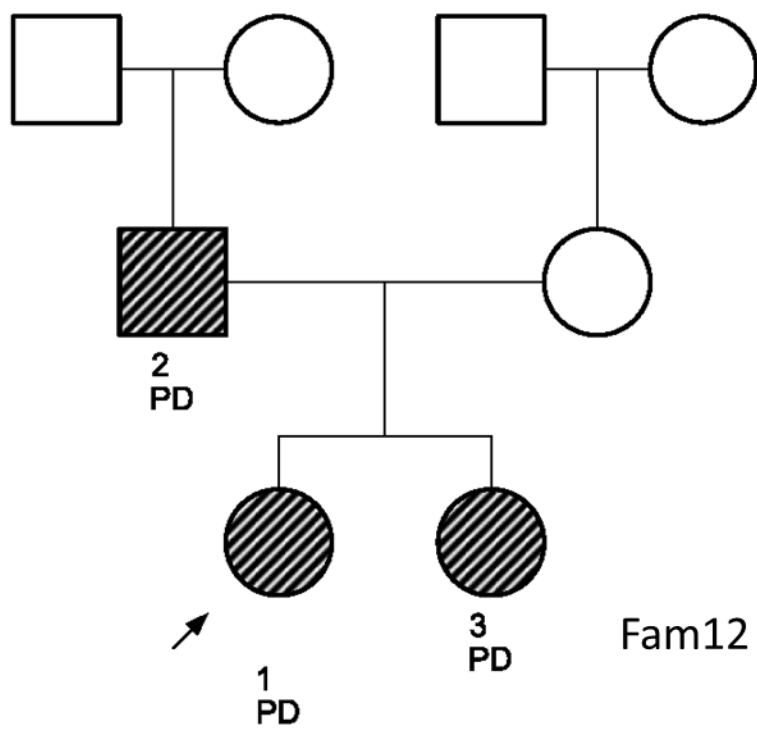

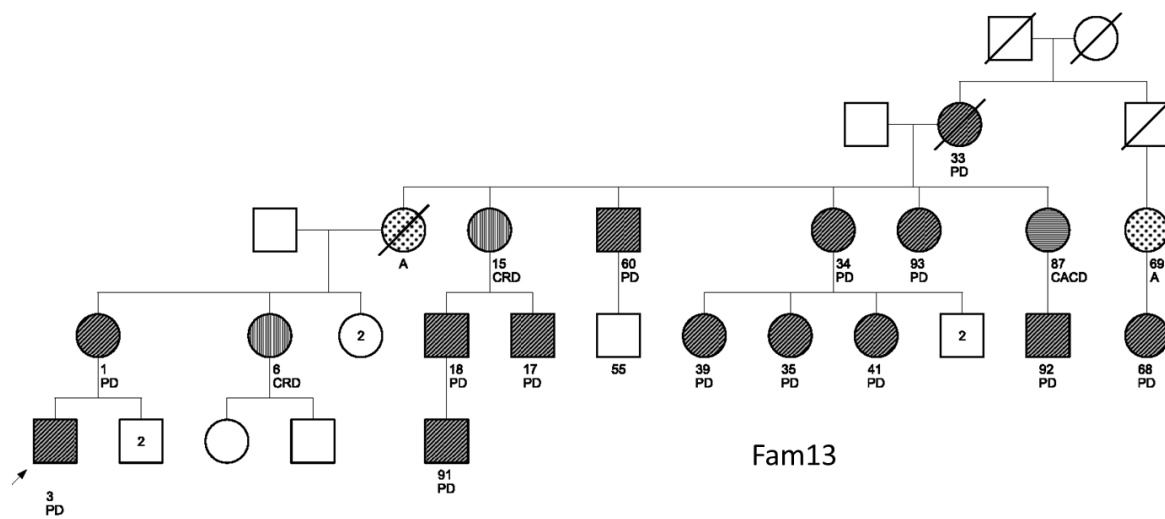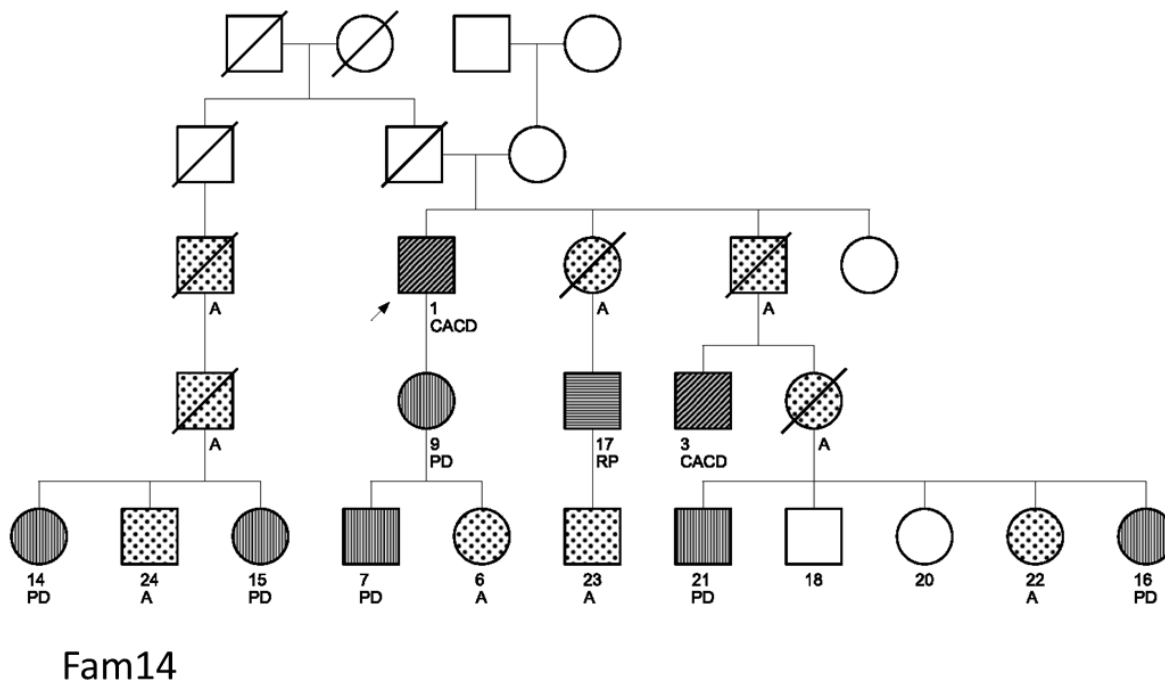



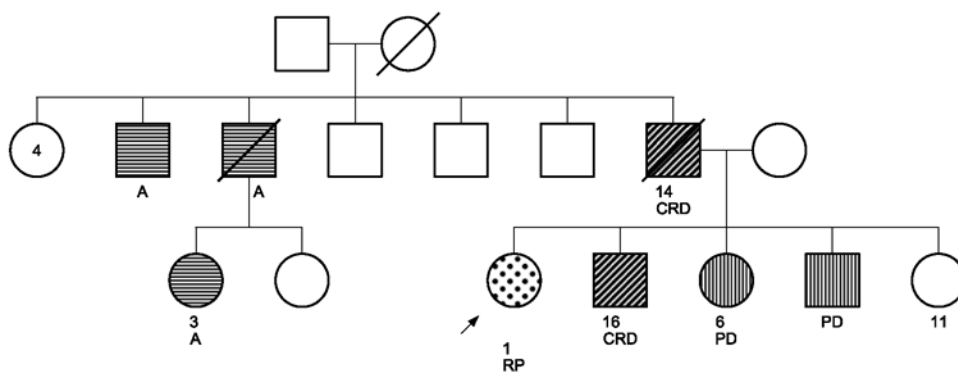

Fam 15

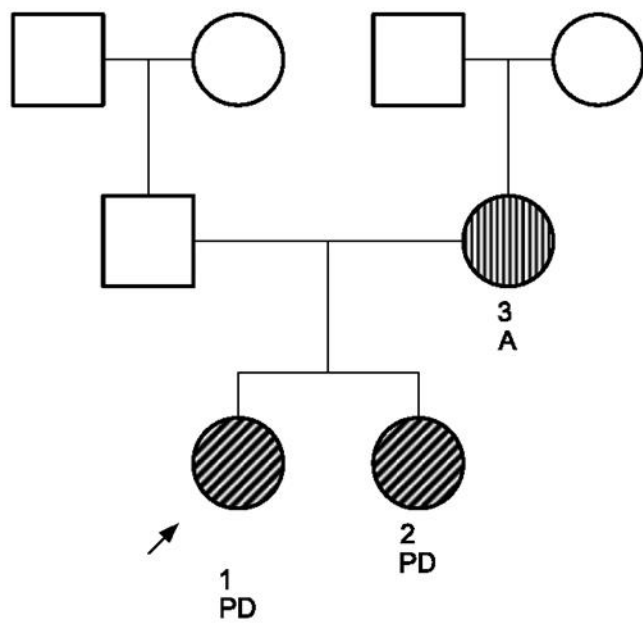

Fam16
